# Supplementary material for: A dual-functional molecular strategy for in situ suppressing and visualizing of neuraminidase in aqueous solution using iridium(iii) complexes
Source: Royal Society of Chemistry journal article supplement (doi:10.1039/c9cc02189b), 2019-01-01
Supplement: c9cc02189b1.pdf [file c9cc02189b1.pdf]

Electronic Supplementary Material (ESI)

## *Electronic Supplementary Information*

### **A dual-functional molecular strategy for in-situ suppressing and visualizing of neuraminidase in aqueous solution using iridium(III) complexes**

Chun Wu,<sup>‡a</sup> Ke-Jia Wu,<sup>‡b</sup> Jin-Biao Liu,<sup>‡a,c</sup> Xiao-Ming Zhou,<sup>d</sup> Chung-Hang Leung<sup>\*b</sup> and Dik-Lung Ma<sup>\*a</sup>

<sup>a</sup> Department of Chemistry, Hong Kong Baptist University, Kowloon, Hong Kong, China.

<sup>b</sup> State Key Laboratory of Quality Research in Chinese Medicine, Institute of Chinese Medical Sciences, University of Macau, Macao, China.

<sup>c</sup> School of Metallurgical and Chemical Engineering, Jiangxi University of Science and Technology, Ganzhou, China.

<sup>d</sup> MOE Key Laboratory of Laser Life Science and Institute of Laser Life Science, College of Biophotonics, South China Normal University, Guangzhou, China.

<sup>‡</sup> The authors contribute equally in this work.

<sup>\*</sup> Corresponding authors.

E-mail addresses: edmondma@hkbu.edu.hk (Dik-Lung Ma) and duncanleung@um.edu.mo (Chung-Hang Leung).

## Experimental

### Material

Unless specified, all the reagents were purchased from Sigma Aldrich (St. Louis, MO) and used as received without further purification, and all aqueous solutions were prepared with Milli-Q water ( $18.2 \text{ M}\Omega \text{ cm}^{-1}$ ) unless specified. Iridium chloride hydrate ( $\text{IrCl}_3 \cdot x\text{H}_2\text{O}$ ) was purchased from Precious Metals Online (Australia).

### General Experiment

Mass spectrometry was performed in the Mass Spectroscopy Unit at Department of Chemistry, Hong Kong Baptist University, Hong Kong (China). Deuterated solvents for NMR purposes were obtained from Armar and used as received.  $^1\text{H}$  and  $^{13}\text{C}$  NMR were recorded on a Bruker Avance 400 spectrometer operating at 400 MHz ( $^1\text{H}$ ) and 100 MHz ( $^{13}\text{C}$ ).  $^1\text{H}$  and  $^{13}\text{C}$  chemical shifts were referenced internally to solvent shift (Acetonitrile- $d_3$ :  $^1\text{H}$ , 1.94,  $^{13}\text{C}$ , 1.32 and 118.26). Chemical shifts are quoted in ppm, the downfield direction being defined as positive. Uncertainties in chemical shifts are typically  $\pm 0.01$  ppm for  $^1\text{H}$  and  $\pm 0.05$  for  $^{13}\text{C}$ . Coupling constants are typically  $\pm 0.1$  Hz for  $^1\text{H}$ - $^1\text{H}$  and  $\pm 0.5$  Hz for  $^1\text{H}$ - $^{13}\text{C}$  couplings. The following abbreviations are used for convenience in reporting the multiplicity of NMR resonances: s, singlet; d, doublet; t, triplet; q, quartet; m, multiplet; br, broad. All NMR data was acquired and processed using standard Bruker software (Topspin).

### Synthesis of complexes **11a–11d**

Complex **11a** were prepared according to modified literature methods.<sup>1,2,3</sup> Briefly, 2.1 equivalents of 1-phenylisoquinoline and 1 equivalent of  $\text{IrCl}_3 \cdot x\text{H}_2\text{O}$  were mixed together and further heated overnight at 120 °C in 12 mL of 2-methoxyethanol/ $\text{H}_2\text{O}$  (3/1). Afterwards, the mixture was filtered and washed by excessive deionized water

and then diethyl ether for three times respectively to generate the dichloro-bridged dimer  $[\text{Ir}(\text{piq})_2\text{Cl}]_2$ . The oven-dried dimer was treated with 2.1 equivalents of 1,10-phenanthroline-5-carboxylic acid in DCM (4 mL) and methanol (4 mL) at ambient temperature for 10 h. Then, an excess of solid ammonium hexafluorophosphate ( $\text{NH}_4\text{PF}_6$ ) was added and the reaction was stirred for another 20 min. The brown powder thus obtained was isolated and filtrated by removing the solvent under reduced pressure, and the residue was purified by silica gel column chromatography employing DCM and methanol as solvent. Yield: 48%. Complexes **11b–11d** were synthesized by the same method as that of complex **11a** via the modification of the auxiliary C^N and N^N ligands in parent complex **11a**.

#### Synthesis of complexes **1a–1d**

Complex **1a** was synthesized according to a reported literature<sup>4</sup>. Compound **11a** (0.45 g, 1 eq.) was dissolved in distilled DCM (30 mL) at 0 °C. Compound **10** (0.24 g, 1.2 eq.) was added, followed by 1-ethyl-3-(3-dimethylaminopropyl)carbodiimide (EDCI) (0.17 g, 2 eq.), HOBt (0.10 g, 1.5 eq.), and, finally,  $\text{Et}_3\text{N}$  (0.20 g, 4 eq.). After complete addition of reagents, the reaction mixture was stirred at 0 °C for a further 1 h and allowed to complete for 24 h. Completion of reaction was monitored by TLC using MeOH/DCM (5/95, v/v). The solvent was removed under reduced pressure, and the red colour residue was dissolved in EtOAc. The organic layer was washed with  $\text{NaHCO}_3$  (saturated) solution and dried over  $\text{Na}_2\text{SO}_4$ . The organic layer was evaporated and purified by column chromatography to get compound **1a**. Compound **1b–1d** was synthesized by the same method as that of compound **1a** by the replacement of **11a** into **11b–11d**.

Complex **1a** Yield: 62%.  $^1\text{H}$  NMR (400 MHz,  $\text{CDCl}_3$ )  $\delta$  9.03 (s, 1H), 8.87 (s, 2H), 8.62 (s, 1H), 8.36 (s, 1H), 8.23 (s, 2H), 8.00 (s, 2H), 7.78 (s, 2H), 7.69 (s, 5H), 7.09 (s, 4H), 6.88

Electronic Supplementary Material (ESI)

(s, 2H), 6.76 (s, 1H), 6.60 (d,  $J = 21.2$  Hz, 1H), 6.31 (s, 2H), 5.33 (d,  $J = 43.4$  Hz, 1H), 4.68 (d,  $J = 44.0$  Hz, 1H), 4.14 (s, 2H), 3.70 (s, 1H), 3.32 (s, 1H), 3.16 (s, 1H), 2.38 (s, 1H), 2.14 (s, 1H), 1.94 (s, 2H), 1.81 (s, 1H), 1.67 (s, 3H), 1.45 (s, 4H), 0.82 (s, 9H).  $^{13}\text{C}$  NMR (101 MHz,  $\text{CDCl}_3$ )  $\delta$  151.00, 149.92, 145.91, 144.61, 139.43, 138.54, 137.61, 131.55, 131.37, 131.25, 131.13, 130.70, 130.07, 129.84, 128.96, 128.78, 127.74, 126.56, 125.87, 121.51, 121.31, 81.27, 59.82, 28.68, 26.19, 25.37, 24.81, 22.63, 21.67, 13.20, 8.52.

HRMS: Calcd. for  $\text{C}_{59}\text{H}_{54}\text{IrN}_6\text{O}_5\text{PF}_6$   $[\text{M-PF}_6]^+$ : 1119.3785 Found: 1119.3805.

Complex **1b** Yield: 58%.  $^1\text{H}$  NMR (400 MHz, DMSO)  $\delta$  9.05 (ddd,  $J = 29.2, 19.3, 8.0$  Hz, 3H), 8.50 (d,  $J = 9.3$  Hz, 1H), 8.33 (s, 4H), 8.27 (d,  $J = 10.2$  Hz, 1H), 8.15 (d,  $J = 11.1$  Hz, 2H), 8.04 (d,  $J = 7.1$  Hz, 2H), 7.96 (s, 2H), 7.55 (t,  $J = 19.2$  Hz, 2H), 7.14 (t,  $J = 7.4$  Hz, 2H), 7.10 – 6.98 (m, 4H), 6.79 (s, 1H), 6.36 (s, 2H), 4.38 (s, 1H), 4.32 (s, 1H), 4.24 (d,  $J = 6.8$  Hz, 2H), 4.04 (s, 1H), 3.54 (s, 1H), 2.80 (d,  $J = 18.1$  Hz, 1H), 2.06 (s, 1H), 1.92 (d,  $J = 13.0$  Hz, 3H), 1.53 (s, 4H), 0.93 (s, 3H), 0.87 (d,  $J = 4.8$  Hz, 6H).  $^{13}\text{C}$  NMR (101 MHz, DMSO)  $\delta$  170.25, 167.26, 165.91, 165.76, 152.10, 151.52, 150.32, 149.97, 149.69, 146.82, 146.70, 144.47, 139.67, 139.24, 139.01, 135.13, 135.00, 131.71, 130.73, 130.28, 129.12, 128.85, 128.34, 127.77, 125.59, 124.37, 122.92, 120.50, 81.73, 75.51, 61.03, 54.59, 48.86, 30.33, 29.53, 26.29, 25.70, 23.53, 14.59, 9.96, 9.50. HRMS: Calcd. for  $\text{C}_{51}\text{H}_{50}\text{IrN}_6\text{O}_5\text{PF}_6$   $[\text{M-PF}_6]^+$ : 1019.3472 Found: 1019.3436.

Complex **1c** Yield: 56%.  $^1\text{H}$  NMR (400 MHz, DMSO)  $\delta$  8.92 (t,  $J = 6.0$  Hz, 2H), 8.76 (d,  $J = 8.9$  Hz, 1H), 8.56 (s, 1H), 8.44 (d,  $J = 7.0$  Hz, 2H), 8.39 (d,  $J = 10.9$  Hz, 1H), 8.23 (t,  $J = 5.5$  Hz, 1H), 8.17 – 8.10 (m, 2H), 8.04 (d,  $J = 9.9$  Hz, 1H), 7.98 (d,  $J = 12.2$  Hz, 1H), 7.90 (dd,  $J = 18.8, 5.3$  Hz, 1H), 7.61 (d,  $J = 9.2$  Hz, 2H), 7.58 (s, 1H), 7.37 – 7.31 (m, 1H), 7.25 (d,  $J = 6.2$  Hz, 2H), 7.22 – 7.16 (m, 3H), 6.88 (s, 2H), 6.68 (s, 1H), 6.49 (t,  $J = 8.8$  Hz, 2H), 4.17 (s, 3H), 4.12 – 4.08 (m, 1H), 3.86 (s, 1H), 3.43 (s, 1H), 2.47 (s, 3H), 2.06 – 1.95 (m, 2H), 1.60 (s, 2H), 1.51 (s, 2H), 1.47 – 1.39 (m, 3H), 0.84 (t,  $J = 7.2$  Hz, 6H), 0.72 (d,  $J = 4.2$  Hz, 3H).  $^{13}\text{C}$  NMR (101 MHz,  $\text{CDCl}_3$ )  $\delta$  172.46, 169.69, 166.20, 162.34, 156.51,

## Electronic Supplementary Material (ESI)

155.26, 154.86, 152.50, 151.87, 150.95, 147.86, 146.74, 144.70, 143.83, 138.64, 134.54, 132.38, 131.46, 129.89, 128.66, 127.87, 127.28, 125.79, 125.44, 125.01, 123.36, 122.13, 117.72, 60.41, 29.68, 26.36, 25.61, 23.66, 21.27. HRMS: Calcd. for  $C_{58}H_{54}IrN_6O_5Cl_2PF_6 [M-PF_6]^+$ : 1177.3162 Found: 1177.3200.

Complex **1d** Yield: 64%.  $^1H$  NMR (400 MHz, DMSO)  $\delta$  9.35 (d,  $J = 8.6$  Hz, 1H), 8.76 (d,  $J = 8.8$  Hz, 1H), 8.55 (s, 4H), 8.37 (s, 1H), 8.29 (d,  $J = 7.1$  Hz, 2H), 8.22 (d,  $J = 5.5$  Hz, 1H), 8.07 – 8.00 (m, 1H), 7.94 (dd,  $J = 12.6, 5.9$  Hz, 3H), 7.81 (d,  $J = 5.7$  Hz, 1H), 7.55 (d,  $J = 4.3$  Hz, 1H), 7.41 (d,  $J = 7.1$  Hz, 2H), 7.24 (d,  $J = 6.7$  Hz, 1H), 7.13 (dd,  $J = 16.2, 8.8$  Hz, 2H), 7.11 – 7.04 (m, 2H), 6.80 (t,  $J = 6.7$  Hz, 2H), 6.66 (s, 2H), 6.39 (d,  $J = 7.4$  Hz, 2H), 4.20 – 4.13 (m, 3H), 4.11 (d,  $J = 5.6$  Hz, 1H), 3.85 (s, 1H), 2.56 (d,  $J = 15.7$  Hz, 1H), 2.42 (s, 3H), 1.75 (s, 2H), 1.58 (s, 2H), 1.51 (s, 2H), 1.39 (d,  $J = 4.7$  Hz, 3H), 0.80 (s, 3H), 0.71 (dd,  $J = 16.5, 9.2$  Hz, 6H).  $^{13}C$  NMR (101 MHz, DMSO)  $\delta$  174.73, 170.11, 165.84, 163.50, 162.81, 151.76, 150.61, 147.19, 140.71, 139.94, 134.25, 131.11, 130.12, 127.59, 123.25, 118.73, 81.67, 74.97, 61.01, 31.78, 29.13, 27.04, 25.60, 21.94, 21.29, 14.51. HRMS: Calcd. for  $C_{58}H_{56}IrN_6O_5PF_6 [M-PF_6]^+$ : 1109.3941 Found: 1109.3962.

## Photophysical measurement

Emission spectra and lifetime measurements for complexes **1a–1d** were performed on a PTI TimeMaster C720 Spectrometer (Nitrogen laser: pulse output 335 nm) fitted with a 395 nm filter. Error limits were estimated:  $\lambda$  ( $\pm 1$  nm);  $\tau$  ( $\pm 10$  %);  $\phi$  ( $\pm 10$  %). All solvents used for the lifetime measurements were degassed using three cycles of freeze-vac-thaw. Luminescence quantum yields were determined using the method of Demas and Crosby with  $[Ru(bpy)_3][PF_6]_2$  in degassed acetonitrile (ACN) as a standard reference solution ( $\Phi_r = 0.062$ ) and were calculated according to the following reported equation (1):

$$\Phi_s = \Phi_r(B_r/B_s)(n_s/n_r)^2(D_s/D_r) \quad (1)$$

Electronic Supplementary Material (ESI)

Where the subscripts *s* and *r* refer to the sample and reference standard solution respectively, *n* is the refractive index of the solvents, *D* is the integrated intensity, and  $\Phi$  is the luminescence quantum yield. The quantity *B* was calculated by  $B = 1 - 10^{-AL}$ , where *A* is the absorbance at excitation wavelength and *L* is the optical path length.

#### **Inhibition assay of complexes 1a–1d**

After mixing neuraminidase with buffer solution, the inhibitors (oseltamivir and complexes **1a–1d**) were added into the mixtures for 30 min at 100  $\mu$ M. After then, the chemiluminescent substrate was added into the mixed solution for 30 min. The neuraminidase activity was detected at ex/em = 330nm/450nm.

#### **Detection of neuraminidase using complexes 1a–1d as probes**

After mixing neuraminidase into buffer solution, the inhibitor (oseltamivir) was added into the mixtures for 30 min at indicated concentrations. After then, complexes **1a–1d** as probes were added into the mixed solution for 30 min. The luminescence was detected at ex/em = 330nm/600nm.

#### **Dose-dependent assay using complex 1d as an inhibitor**

After mixing neuraminidase and buffer solution, complex **1d** (0–200  $\mu$ M) was added into the mixtures for 30 min. After then, the chemiluminescent substrate was added into the mixed solution for 30 min. The neuraminidase activity was detected at ex/em = 330nm/450nm.

#### **Protein thermal shift assay**

To evaluate binding affinity of complex **1d** with neuraminidase, a protein thermal shift assay was performed using the GloMelt™ Thermal Shift Protein Stability Kit. Briefly, after incubation neuraminidase with different concentrations of complex **1d** for 30 min, GloMelt dye was added. The reaction of each sample in triplicate was run in the

Applied Biosystems™ ViiA™ 7 system. The data were exported to Excel and fluorescence signal of each samples was plotted and a significant increase in slope corresponds to the melting temperature of the protein.

**Table S1** Photophysical properties of complexes **1a–1d** (10  $\mu$ M).

| Complex   | Quantum yield | $\lambda_{\text{ex}}$ / nm | $\lambda_{\text{em}}$ / nm | Lifetime / $\mu$ s | UV-Vis absorption $\lambda_{\text{abs}}$ / nm ( $\epsilon$ / $\text{dm}^3 \text{mol}^{-1} \text{cm}^{-1}$ ) |
|-----------|---------------|----------------------------|----------------------------|--------------------|-------------------------------------------------------------------------------------------------------------|
| <b>1a</b> | 0.293         | 364                        | 601                        | 0.565              | 230 ( $1.42 \times 10^4$ ),<br>288 ( $0.85 \times 10^4$ )                                                   |
| <b>1b</b> | 0.409         | 381                        | 606                        | 0.277              | 232 ( $1.16 \times 10^4$ ),<br>263 ( $1.12 \times 10^4$ )                                                   |
| <b>1c</b> | 0.963         | 358                        | 585                        | 0.517              | 210( $1.77 \times 10^4$ ),<br>282 ( $1.06 \times 10^4$ )                                                    |
| <b>1d</b> | 0.550         | 354                        | 603                        | 0.283              | 212 ( $1.55 \times 10^4$ ),<br>269 ( $0.91 \times 10^4$ )                                                   |

**Synthesis route 1:**

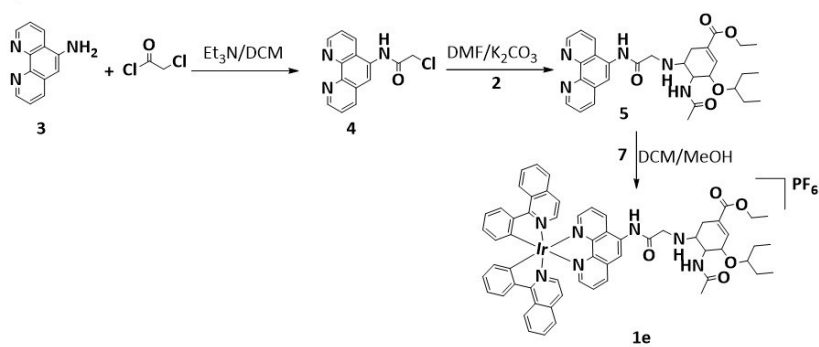

**Synthesis route 2:**

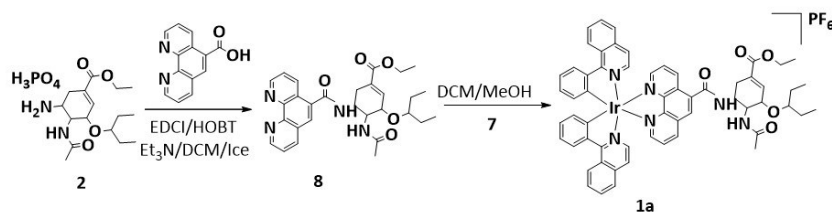

**Synthesis route 3:**

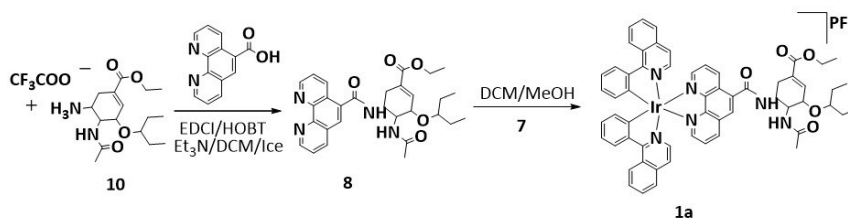

**Scheme S1** Synthesis route of iridium(III) complexes **1a** and **1e**.



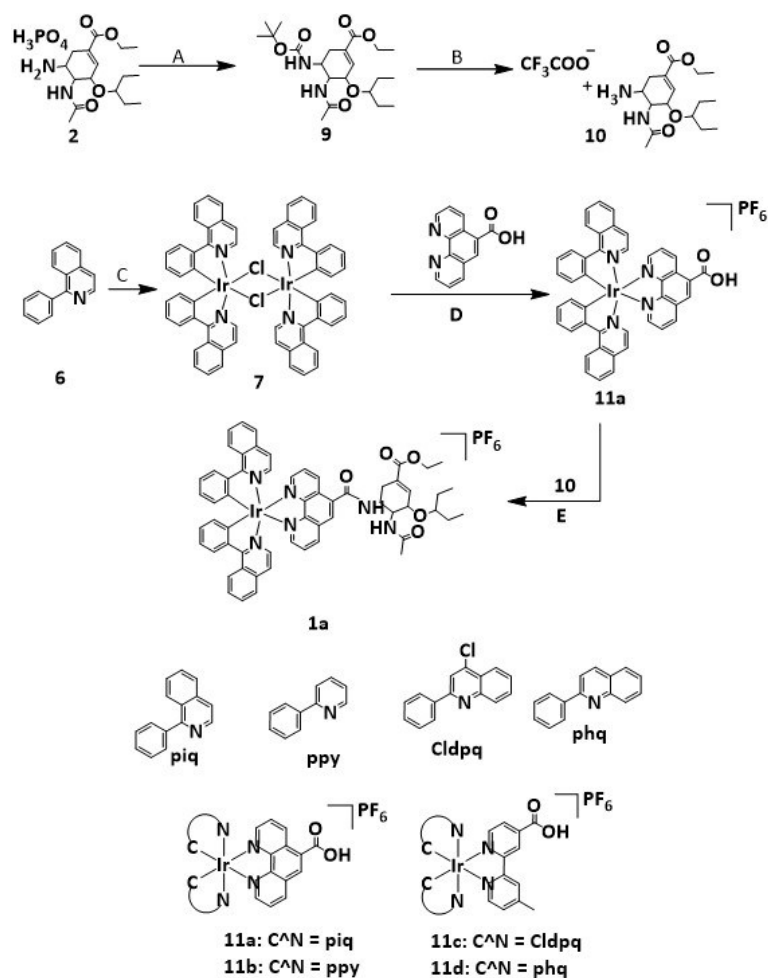

**Scheme S2** Synthesis route of iridium(III) complexes **1a–1d**. Conditions: (A) 10% Na<sub>2</sub>CO<sub>3</sub>, 1,4-dioxane, di-*tert*-butyl decarbonate, 0 °C to r.t., yield = 93%; (B) trifluoroacetic acid, DCM, 0 °C to r.t., yield = 90%; (C) 2-methoxyethanol/H<sub>2</sub>O (3:1, v/v), yield = 80%; (D) DCM/methanol (1:1, v/v), yield = 70%; (E) EDCI/HOBT, Et<sub>3</sub>N, DCM, 0 °C to r.t., yield = 60%.

In **Route 1**, 1,10-phenanthroline-5-amine **3** was first reacted with 2-chloroacetyl chloride in dichloromethane (DCM) using Et<sub>3</sub>N as a catalyst to generate 2-chloro-*N*-(1,10-phenanthroline-5-yl)acetamide **4**. The water-soluble oseltamivir was then directly mixed with **4** in DMF with K<sub>2</sub>CO<sub>3</sub>, however, only a low yield (12%) of **5** was produced. Moreover, further optimization of the solvent (THF or ACN), base (Cs<sub>2</sub>CO<sub>3</sub>), or temperature (reflux or ambient) failed to increase the yield of **5**.

In **Route 2**, we used the more reactive 1,10-phenanthroline-5-carboxylic acid) to

directly conjugate to oseltamivir phosphate **2** under standard EDCI/HOBT coupling conditions. Unfortunately, the yield of the target oseltamivir conjugate **8** also turned out to be disappointing (15%) owing to the poor solubility of oseltamivir phosphate **2** in organic solvent.

To overcome the solubility issue, oseltamivir phosphate **2** was first reacted with di-*tert*-butyl dicarbonate to give the amine-protected compound **9** (**Scheme S2**). Afterwards, compound **9** was deprotected using trifluoroacetic acid in DCM at 0 °C, giving the organic solvent-soluble oseltamivir trifluoroacetate compound **10**. However, conjugation of oseltamivir trifluoroacetate **10** to the carboxyl-containing N<sup>^</sup>N ligand 1,10-phenanthroline-5-carboxylic acid proceeded poorly (**Synthesis Route 3, Scheme S1**).

Electronic Supplementary Material (ESI)

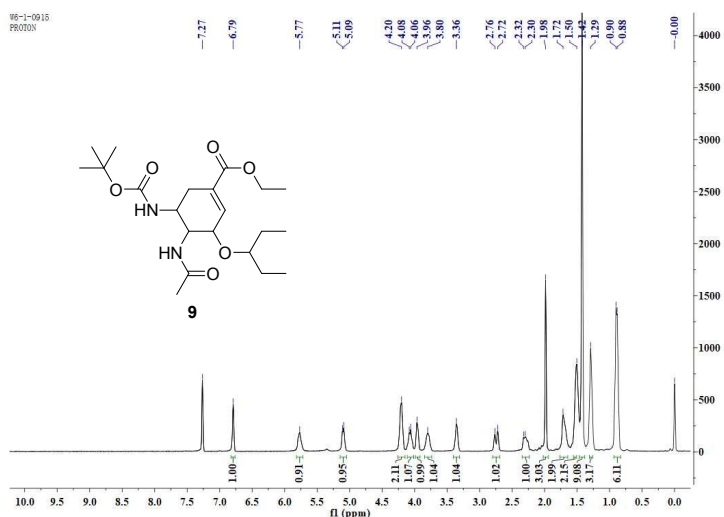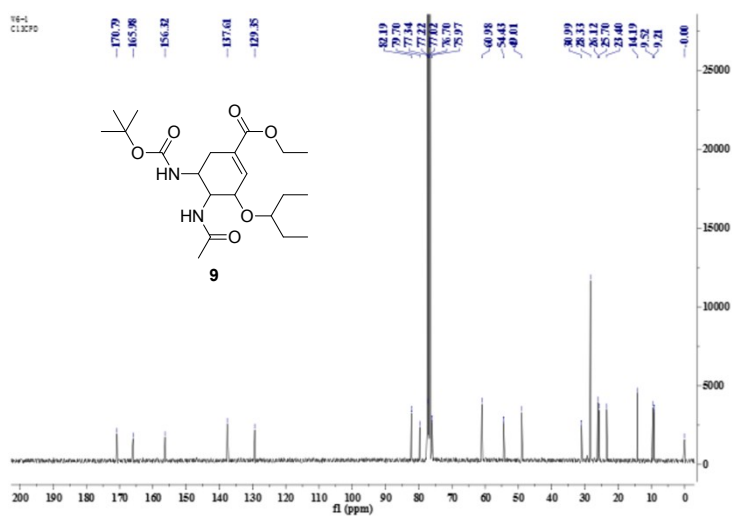

HONG KONG BAPTIST UNIVERSITY, DEPARTMENT OF CHEMISTRY (MALDI-TOF)

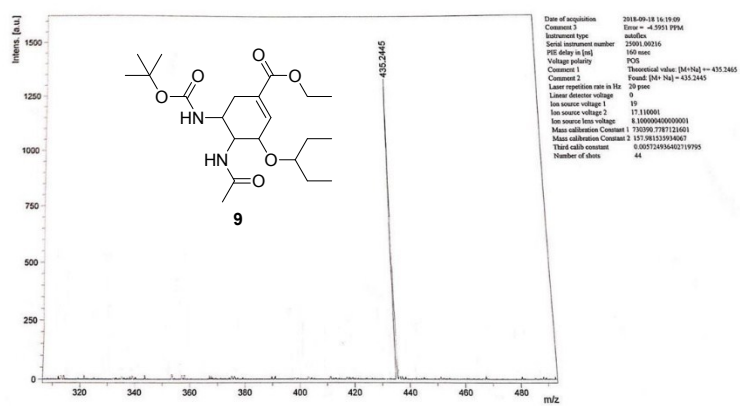

Acquisition method name: D:\Method\dev\Comp\Method\zhu\RP2\_PepMix 800-6000 09-2018.gm  
Sample name (file name prefix): 08-1-0915\_0173

printed: 08/18/2018 04:19:21 PM

Electronic Supplementary Material (ESI)

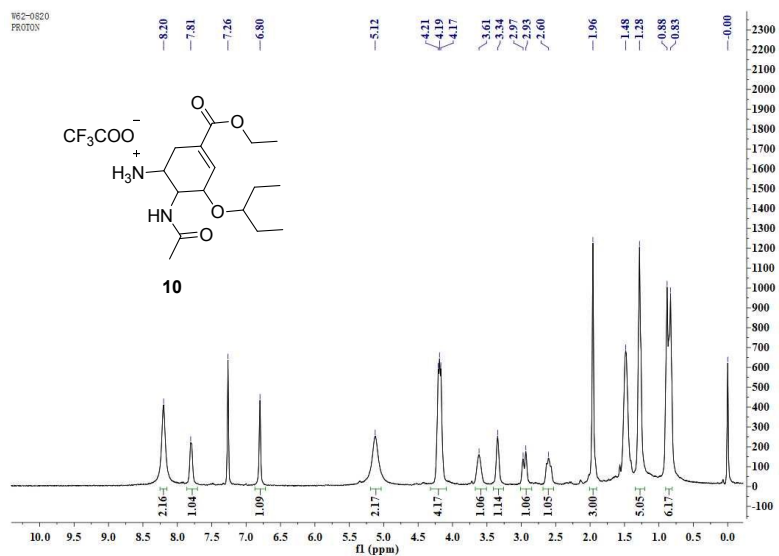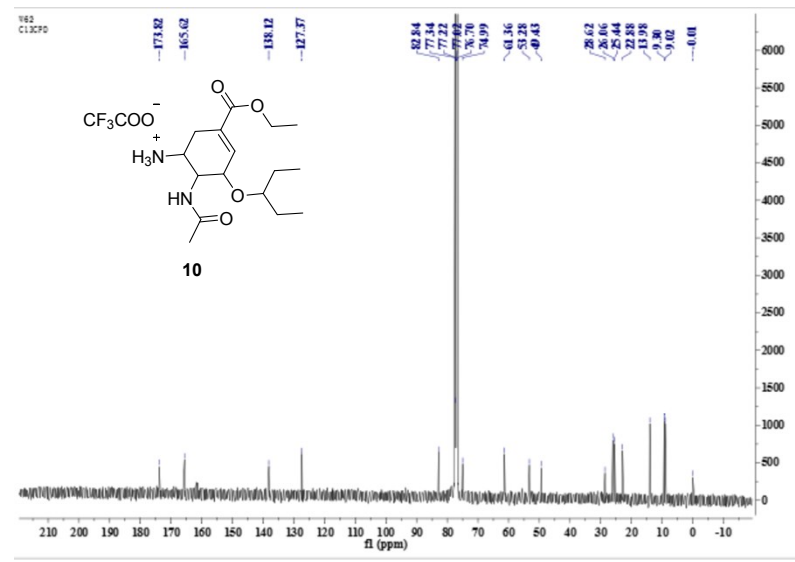

HONG KONG BAPTIST UNIVERSITY, DEPARTMENT OF CHEMISTRY (MALDI-TOF)

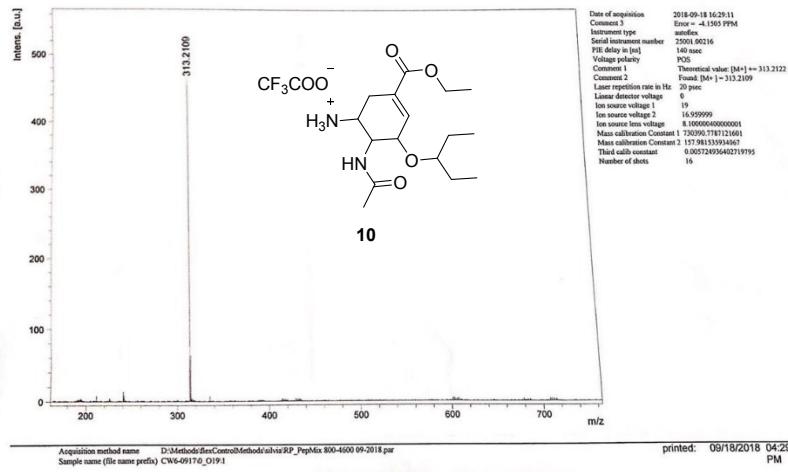

Electronic Supplementary Material (ESI)

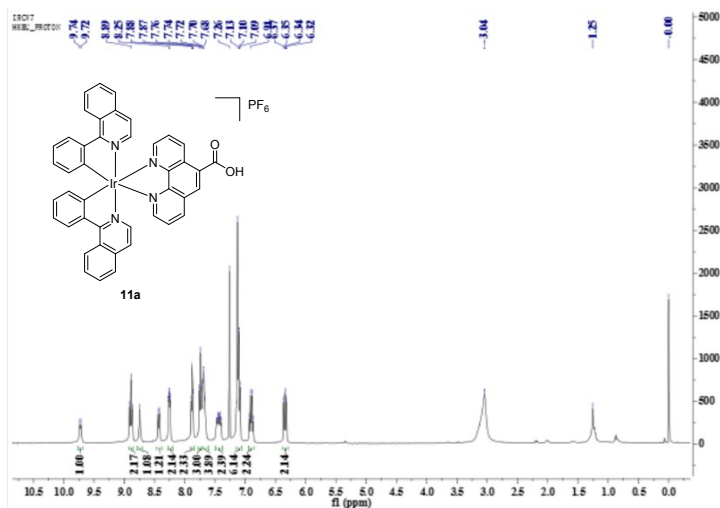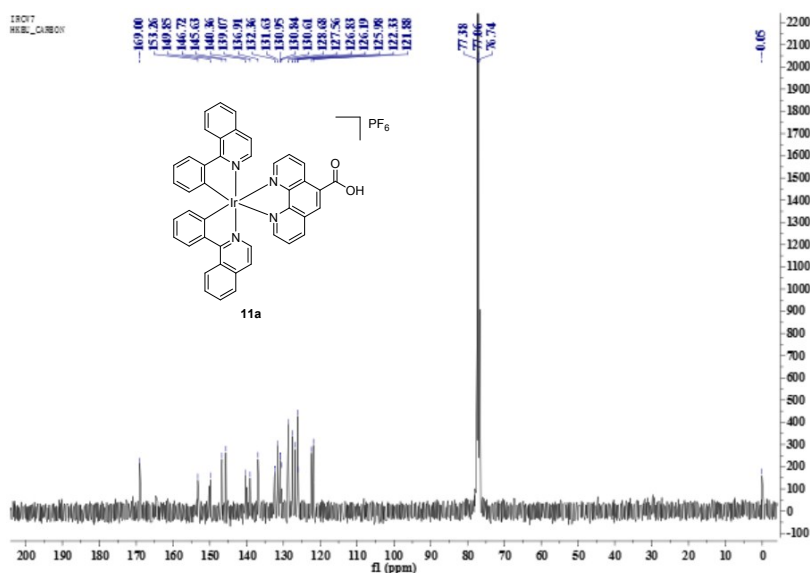

HONG KONG BAPTIST UNIVERSITY, DEPARTMENT OF CHEMISTRY (MALDI-TOF)

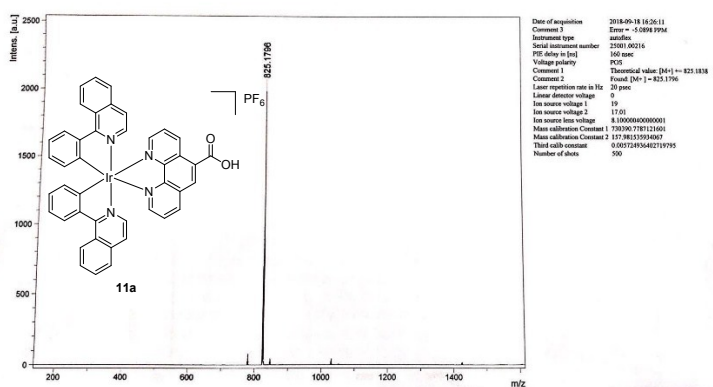

Date of acquisition: 2018-09-18 16:26:11  
 Comment 1: Error = 0.00949984  
 Instrument type: auto  
 Serial instrument number: 2500180216  
 PPS delay in [ns]: 160 nsec  
 Voltage polarity: POS  
 Comment 1: Theoretical value [M+]<sup>+</sup>: 822.1818  
 Comment 2: found [M+]<sup>+</sup>: 822.1790  
 Laser repetition rate in Hz: 20 pps  
 Laser detector voltage: 0  
 Ion source voltage 1: 50  
 Ion source voltage 2: 5100  
 Ion source lens voltage: 8.100000000000001  
 Mass calibration Comment 1: 700.00: 7101.11061  
 Mass calibration Comment 2: 137.9815159349037  
 Third calib comment: 0.0072495642119795  
 Number of shots: 200

Acquisition method name: D:\Methods\GenComs\Maldit\hku\RP\_Fp\Mix\_800-600\_09-2018\_jur  
 Sample name (file name prefix): RSCW-49174\_0201

printed: 09/18/2018 04:28:33 PM

Electronic Supplementary Material (ESI)

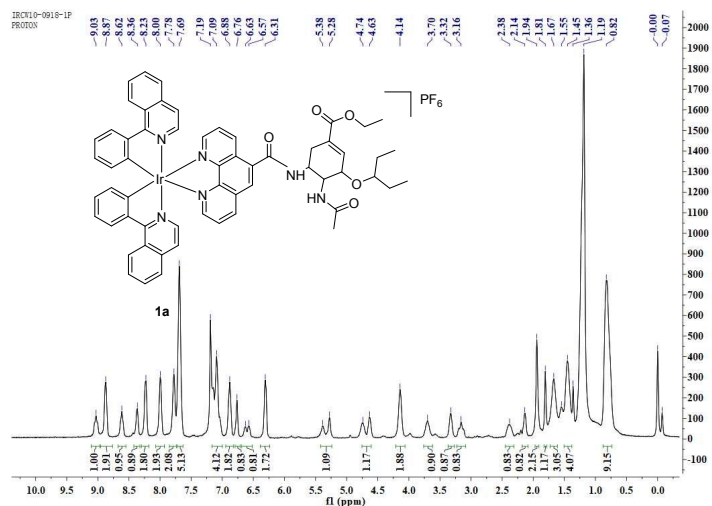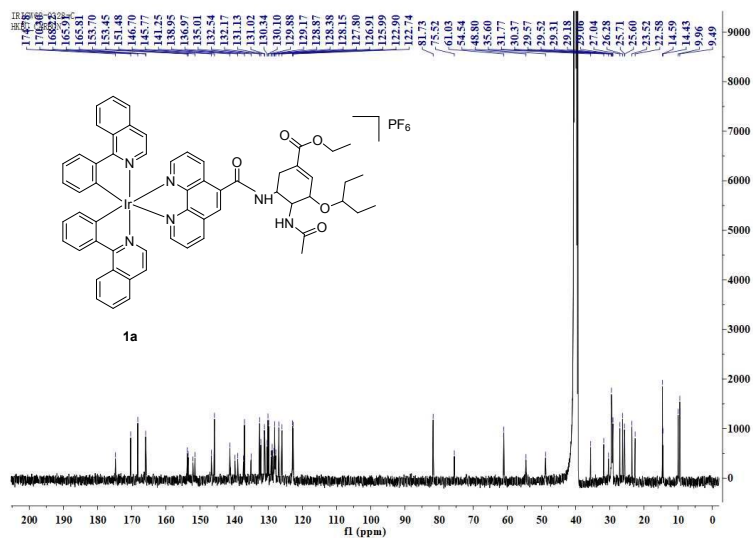

HONG KONG BAPTIST UNIVERSITY, DEPARTMENT OF CHEMISTRY (MALDI-TOF)

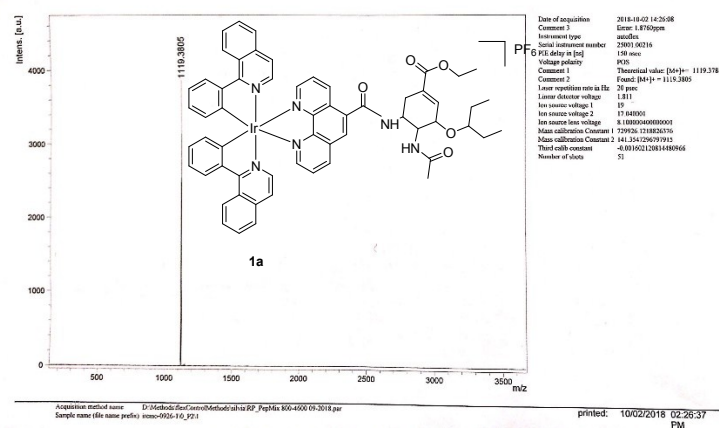

Electronic Supplementary Material (ESI)

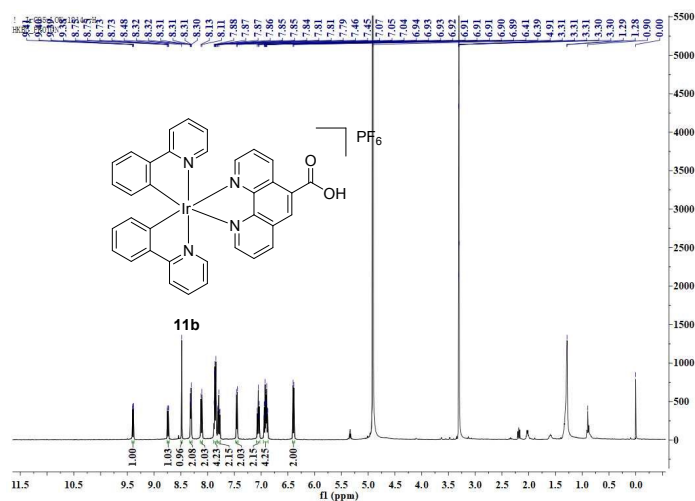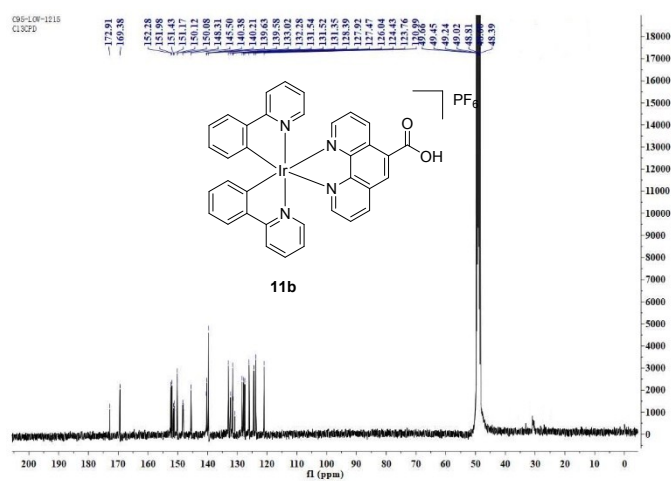

HONG KONG BAPTIST UNIVERSITY, DEPARTMENT OF CHEMISTRY (MALDI-TOF)

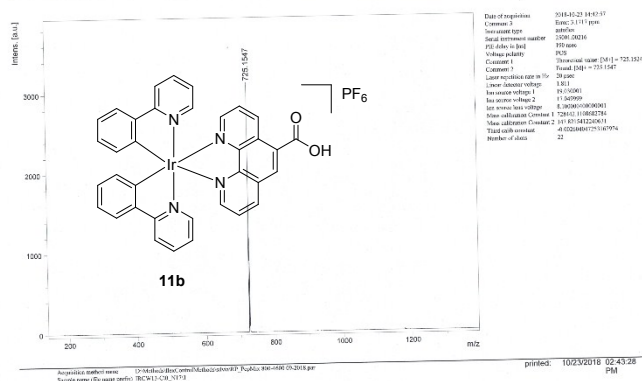

Electronic Supplementary Material (ESI)

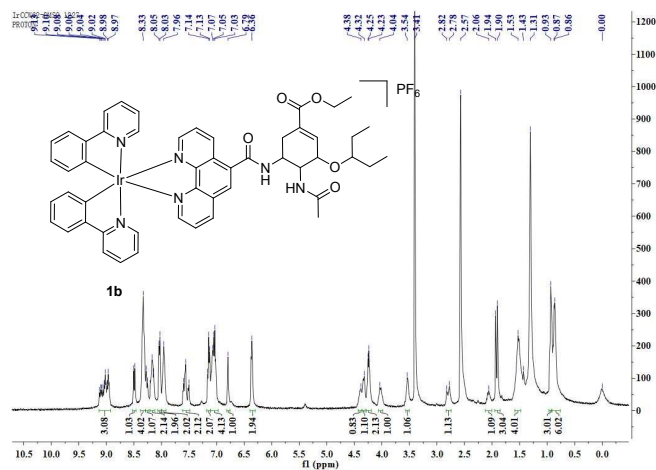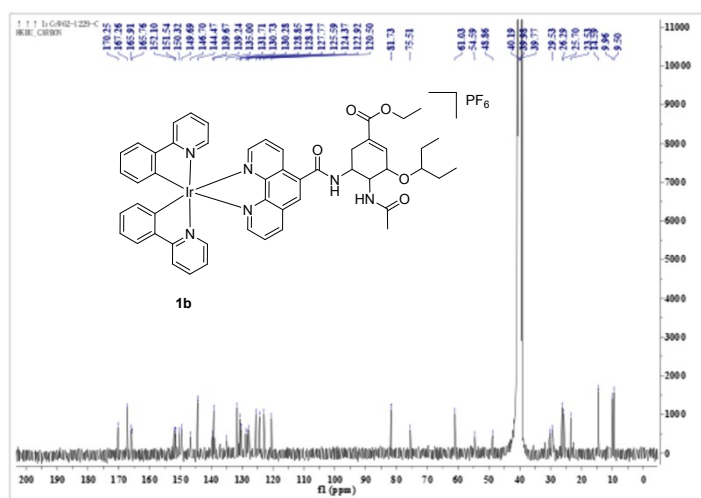

HONG KONG BAPTIST UNIVERSITY, DEPARTMENT OF CHEMISTRY (MALDI-TOF)

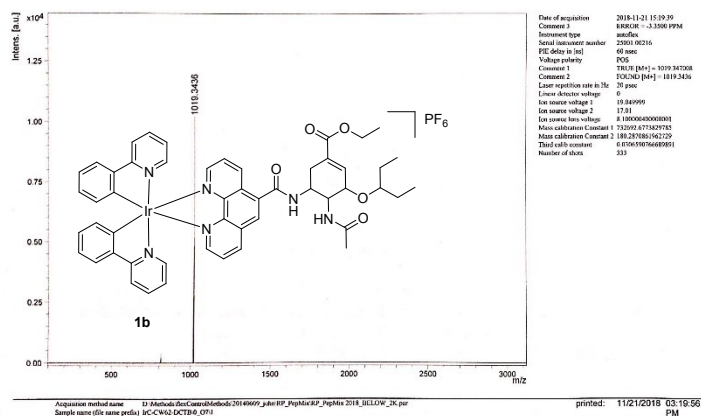



# Electronic Supplementary Material (ESI)

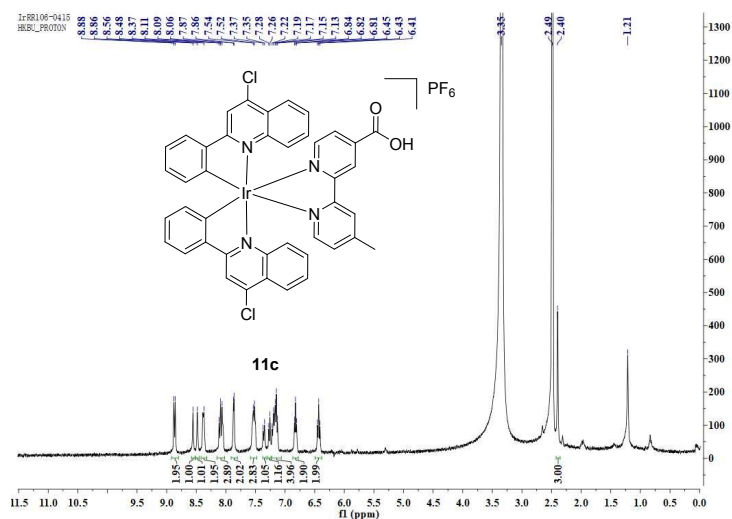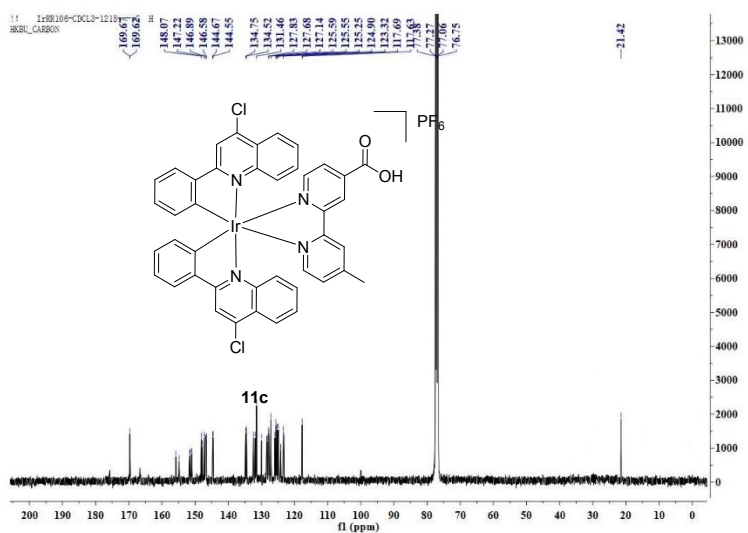

## HONG KONG BAPTIST UNIVERSITY, DEPARTMENT OF CHEMISTRY (MALDI-TOF)

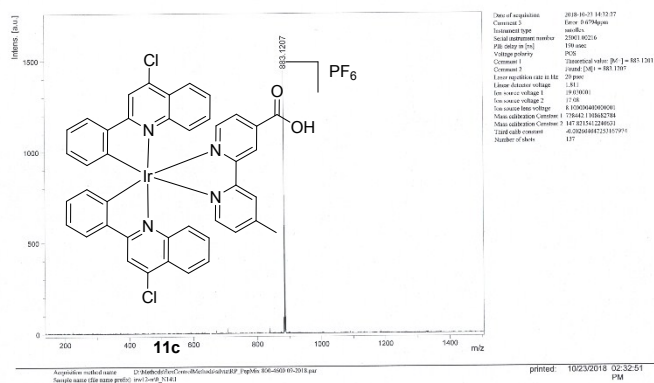

Electronic Supplementary Material (ESI)

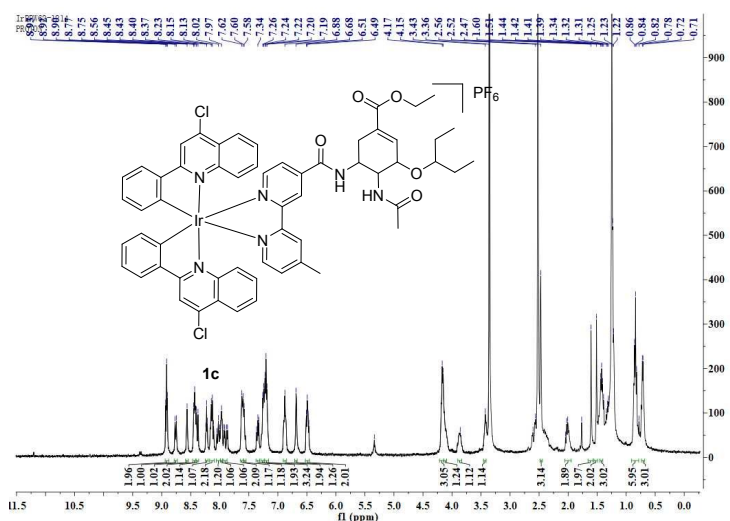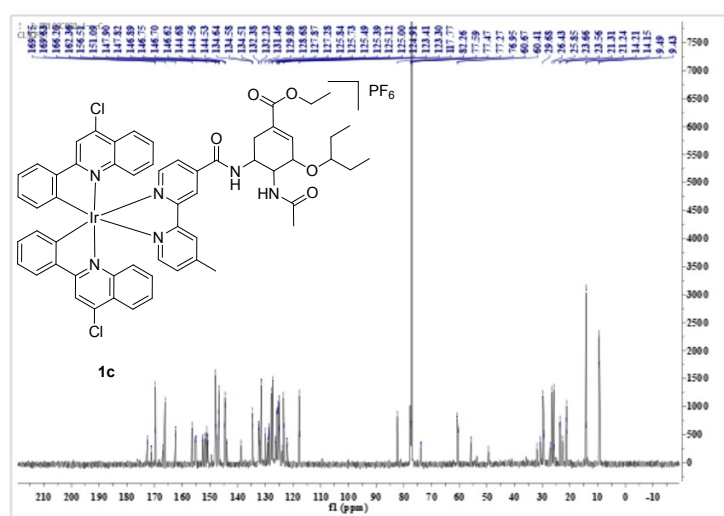

**HONG KONG BAPTIST UNIVERSITY, DEPARTMENT OF CHEMISTRY (MALDI-TOF)**

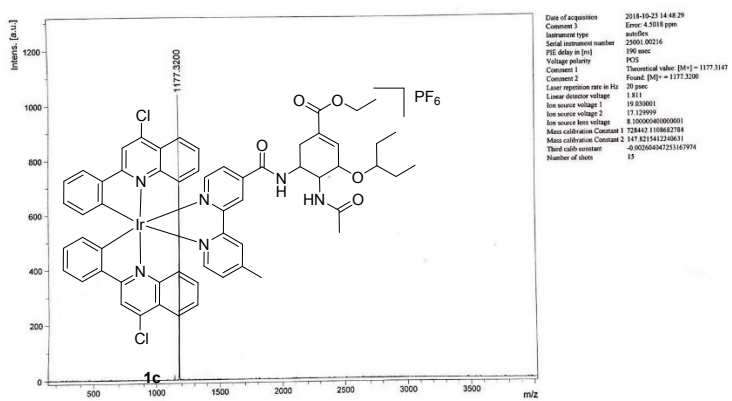

Acquisition method name: D:\Data\MSD\Sec\Chem\4600\4600-09-2018.par  
Sample name (file name prefix): DRCW15-RX219\_N191

Printed: 10/23/2018 02:48:10 PM

Electronic Supplementary Material (ESI)

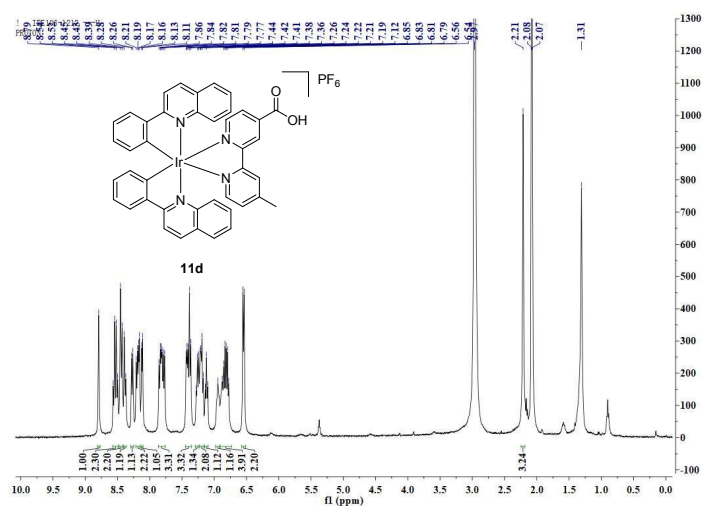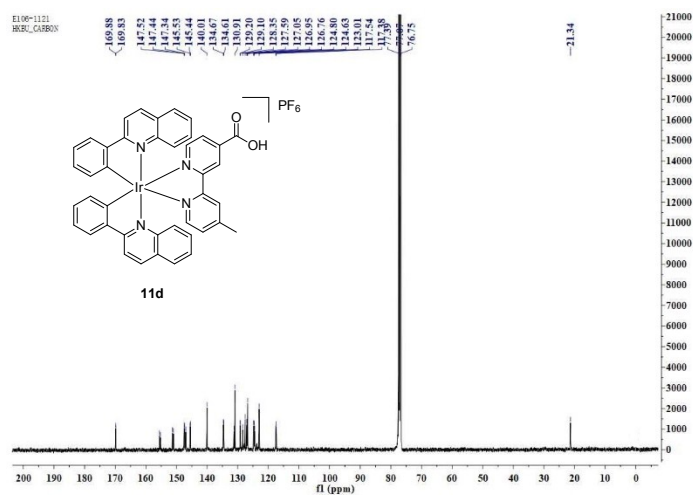

HONG KONG BAPTIST UNIVERSITY, DEPARTMENT OF CHEMISTRY (MALDI-TOF)

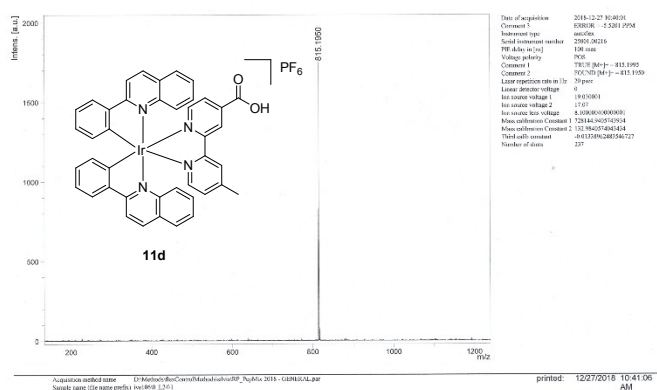

Electronic Supplementary Material (ESI)

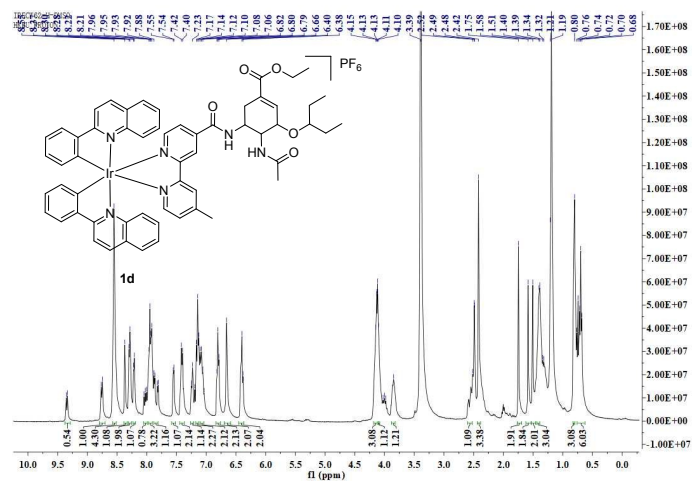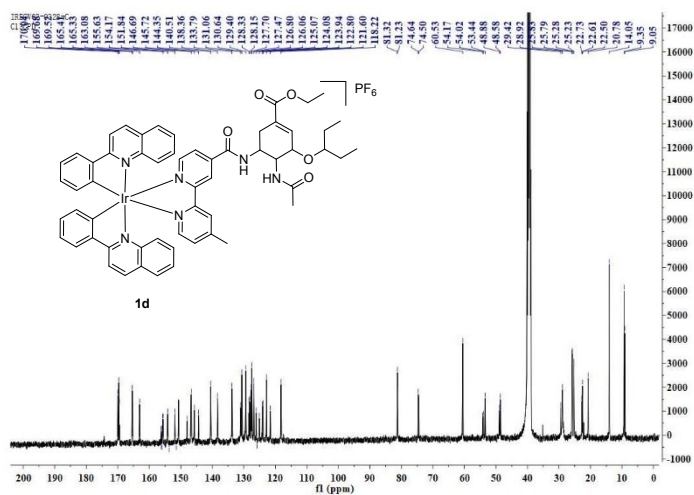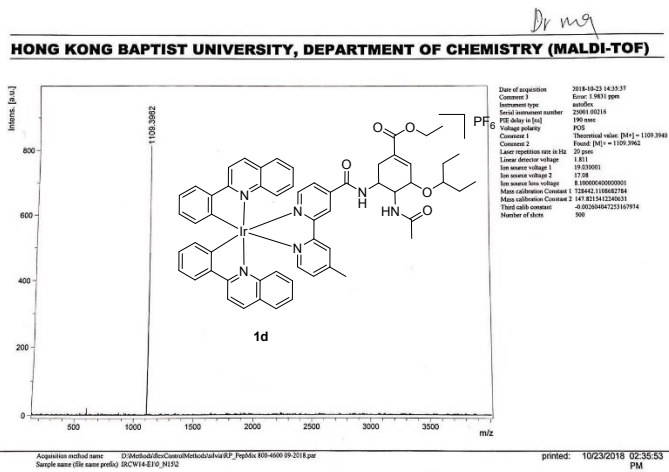

Electronic Supplementary Material (ESI)

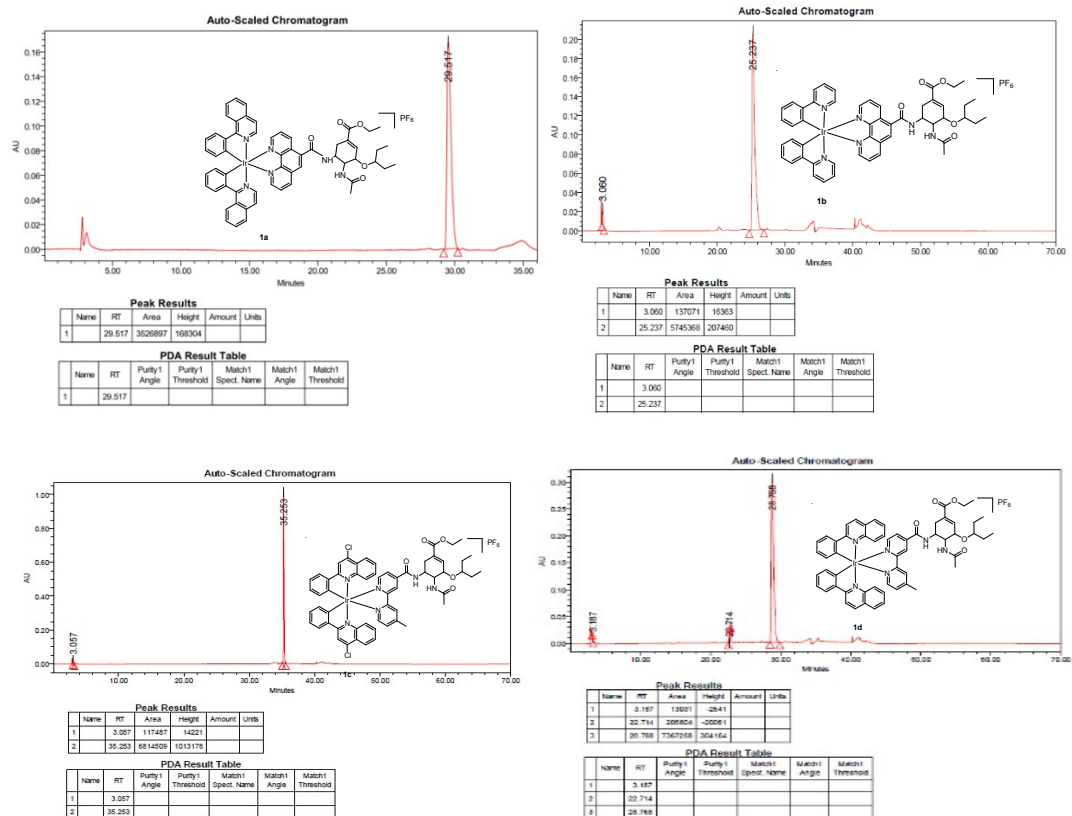

Fig. S1  $^1\text{H}$  NMR,  $^{13}\text{C}$  NMR, HRMS and HPLC spectra for compounds **9**, **10**, **11a–11d** and **1a–1d**.

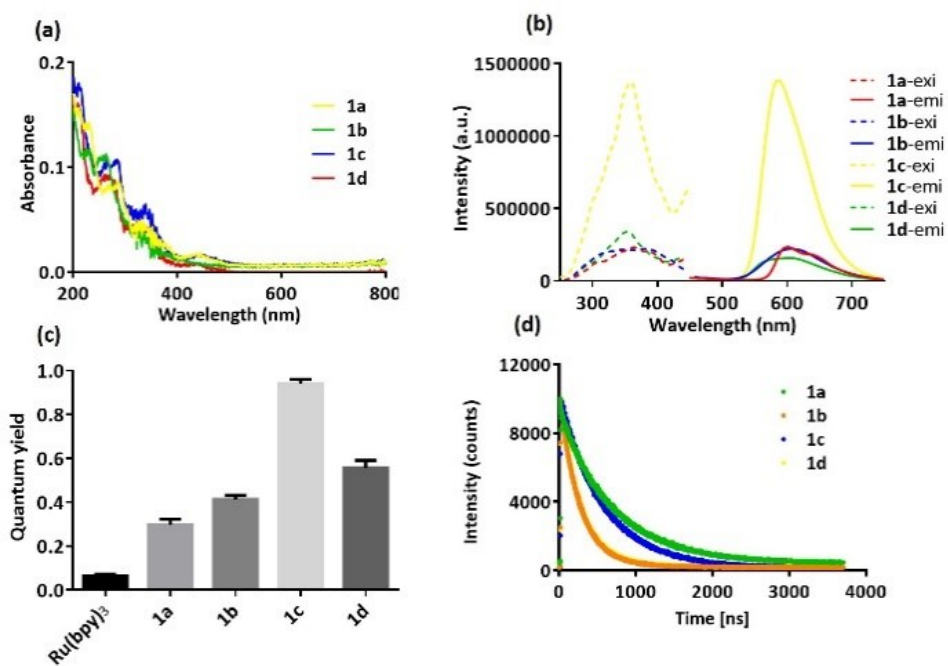

Fig. S2 **(a)** Absorbance spectra of complexes **1a–1d** (10  $\mu\text{M}$ ) in ACN. **(b)** Excitation and emission spectra of complexes **1a–1d** (5  $\mu\text{M}$ ) in PBS buffer containing 0.5% ACN. **(c)**

Quantum yields of complexes **1a–1d** (10  $\mu\text{M}$ ). **(d)** Emission decay curves of complexes **1a–1d** (10  $\mu\text{M}$ ) in DMSO.

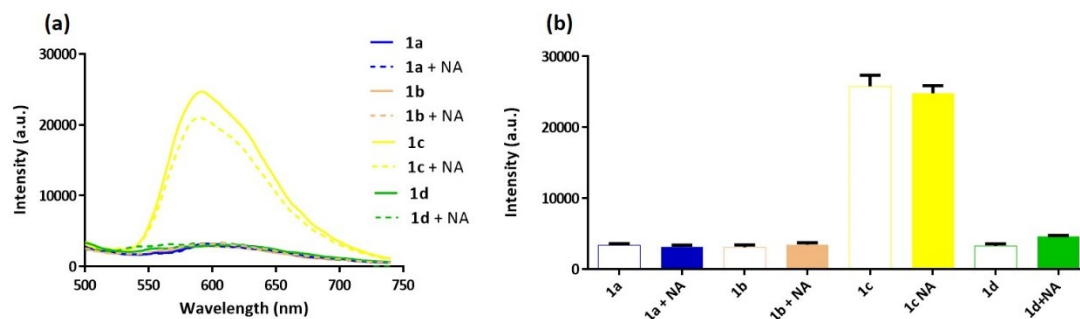

**Fig. S3** **(a)** Emission spectra of the response of complexes **1a–1d** (100  $\mu\text{M}$ ) as a luminescent probe for NA (10  $\mu\text{g}/\text{mL}$ ) in PBS buffer containing 0.5% ACN. **(b)** Column diagram of the response of complexes **1a–1d** (100  $\mu\text{M}$ ) as a luminescent probe for NA (10  $\mu\text{g}/\text{mL}$ ). The luminescence intensity was detected at ex/em = 330 nm/600 nm.

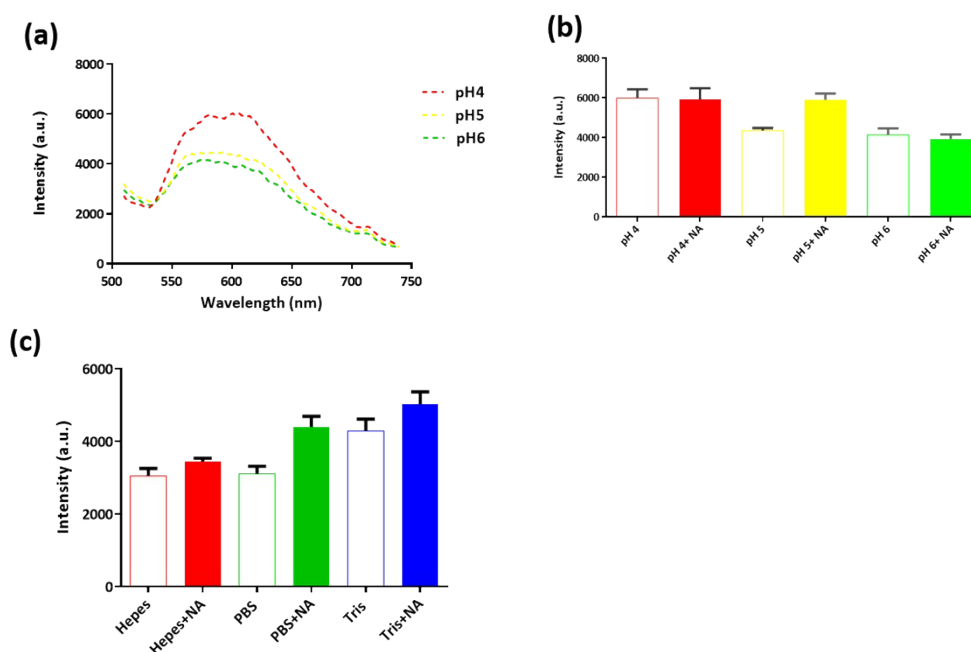

**Fig. S4** **(a)** Luminescence spectra of complex **1d** (5  $\mu\text{M}$ ) in PBS buffer at various pH values; **(b)** Luminescence intensity of complex **1d** (5  $\mu\text{M}$ ) at the absence and presence of NA (10  $\mu\text{M}$ ) in PBS buffer with various pH values; **(c)** Luminescence intensity of complex **1d** (5  $\mu\text{M}$ ) at the absence and presence of NA (10  $\mu\text{M}$ ) in different buffer

solutions containing 0.5% ACN.

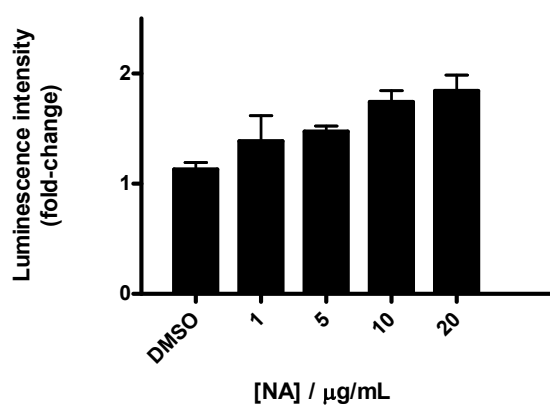

**Fig. S5** Dose-dependent assay using complex **1d** (100  $\mu\text{M}$ ) as a luminescent probe for NA (0–20  $\mu\text{g/mL}$ ). The luminescence intensity was detected at ex/em = 330 nm/600 nm.

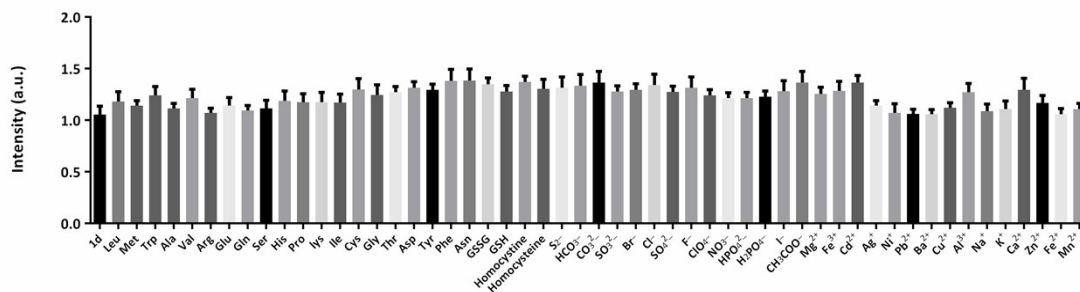

**Fig. S6** Luminescence intensity of complex **1d** (5  $\mu\text{M}$ ) in the absence and presence of various potentially interfering species including amino acids, anions or cations (20  $\mu\text{M}$ ).

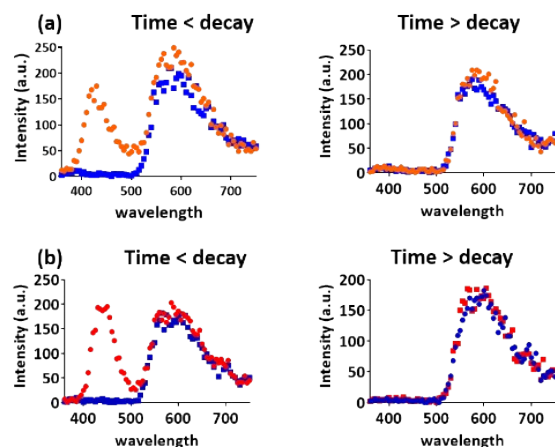

**Fig. S7** Time-resolved spectra of complex **1d** (10  $\mu\text{M}$ ) with (red dots) or without (blue dots) the presence of fluorescent organic dyes **(a)** thioflavin S (THS) and **(b)** coumarin 460 (Cm460) as two model matrix interferences in DMSO.

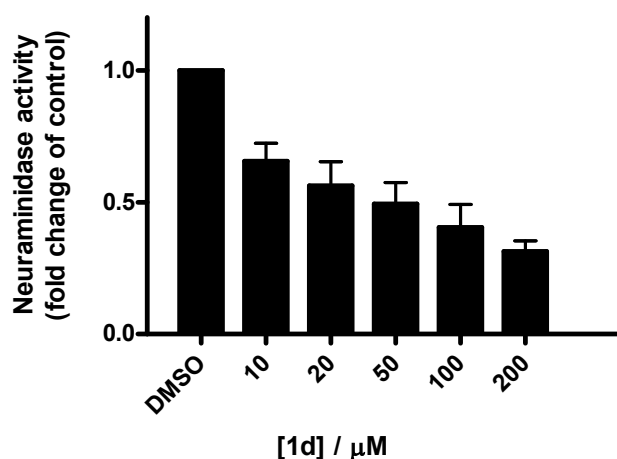

**Fig. S8** Dose-dependent assay using complex **1d** (0–200  $\mu\text{M}$ ) as an inhibitor for NA (10  $\mu\text{g/mL}$ ). The luminescence intensity was detected at ex/em=330 nm/450 nm.

## References

1. M. Wang, Z. Mao, T. S. Kang, C. Y. Wong, J. L. Mergny, C.-H. Leung, D.-L. Ma, *Chem. Sci.*, 2016, **7**, 2516.
2. D.-L. Ma, T. Xu, D. S.-H. Chan, B. Y.-W. Man, C.-H. Leung, *Nucleic Acids Res.*, 2011, **39**, e67.
3. W. Zhang, F. Zhang, Y.-L. Wang, B. Song, R. Zhang and J. Yuan, *Inorg. Chem.*, 2017, **56**, 1309-1318.
4. K. Vellaisamy, G. Li, C.-N. Ko, H.-J. Zhong, S. Fatima, H.-Y. Kwan, C.-Y. Wong, W.-J. Kwong, W. Tan, C.-H. Leung, D.-L. Ma, *Chem. Sci.*, 2018, **9**, 1119.



Electronic Supplementary Material (ESI)

5. H.-J. Zhong, L. Lu, K.-H. Leung, C. C. Wong, C. Peng, S.-C. Yan, D.-L. Ma, Z. Cai, H.-M. D. Wang and C.-H. Leung, *Chem. Sci.*, 2015, **6**, 5400-5408.
6. L.-J. Liu, L. Lu, H.-J. Zhong, B. He, D. W. J. Kwong, D.-L. Ma and C.-H. Leung, *J. Med. Chem.*, 2015, **58**, 6697-6703.
7. L. Lu, H.-J. Zhong, S.-L. H. Modi Wang, H.-W. Li, C.-H. Leung and D.-L. Ma, *Sci. Rep.*, 2015, **5**, 14619-14623.
8. D. L. Ma, L. J. Liu, K. H. Leung, Y. T. Chen, H. J. Zhong, D. S. H. Chan, H. M. D. Wang and C. H. Leung, *Angew. Chem. Int. Ed. Engl.*, 2014, **53**, 9178-9182.
9. M. Wang, K.-H. Leung, S. Lin, D. S.-H. Chan, C.-H. Leung and D.-L. Ma, *J. Mater. Chem. B*, 2014, **2**, 6467-6471.
10. K.-H. Leung, L. Lu, M. Wang, T.-Y. Mak, D. S.-H. Chan, F.-K. Tang, C.-H. Leung, H.-Y. Kwan, Z. Yu and D.-L. Ma, *PloS One*, 2013, **8**, e77021.
11. L. Lu, D. S.-H. Chan, D. W. Kwong, H.-Z. He, C.-H. Leung and D.-L. Ma, *Chem. Sci.*, 2014, **5**, 4561-4568.
12. L. Lu, M. Wang, L.-J. Liu, C.-H. Leung and D.-L. Ma, *ACS Appl. Mater. Interfaces*, 2015, **7**, 8313-8318.
